# Supplementary material for: An International Collaborative Initiative to Establish a Quality-of-Life Questionnaire for Children and Adolescents with Repair of Esophageal Atresia in 14 Countries
Source: MDPI journal article supplement (doi:10.3390/children11030286), 2024-02-26
Supplement: s1 [file s1]

**Supplementary File S2. Description of the data collection method used in the cognitive debriefing interviews of the EA-QOL questionnaire for children aged 8-18 listed in order of the earliest study year and country**

| Country               | Study year | Recruitment source                     | Number of interviewers | Profession of interviewer                                                 | Care and treatment relationship | Location of the interviews                             |
|-----------------------|------------|----------------------------------------|------------------------|---------------------------------------------------------------------------|---------------------------------|--------------------------------------------------------|
| <b>Sweden-Germany</b> | 2016       | Clinical center                        | 3                      | Pediatric Nurse, PhD student, Psychologist, PhD student                   | No                              | Clinical center/Hospital                               |
| <b>Turkey</b>         | 2019       | Clinical center                        | 2                      | Pediatric Surgeons                                                        | Yes                             | Clinical center/Hospital University                    |
| <b>Spain</b>          | 2019       | Clinical center                        | 1                      | Pediatric Surgeon                                                         | No                              | Clinical center/Hospital                               |
| <b>United Kingdom</b> | 2020       | Patient support group, TOFS            | 1                      | Pediatric Surgeon                                                         | No                              | Online/Virtual interviews                              |
| <b>USA</b>            | 2020       | Clinical center                        | 1                      | Quality improvement consultant                                            | No                              | Clinical center/Hospital                               |
| <b>Croatia</b>        | 2020       | Clinical center                        | 3                      | Medical Doctor Professor of pedagogy Pediatric surgeon                    | No                              | Clinical center/Hospital                               |
| <b>Hungary</b>        | 2020       | Clinical center, Patient support group | 2                      | Pediatric gastroenterologist PhD student, a clinical laboratory scientist | No                              | University                                             |
| <b>Poland</b>         | 2021       | Clinical center                        | 4                      | Pediatric Nurse, Geneticist, Pediatric Surgeons                           | Yes                             | Clinical center/Hospital                               |
| <b>China</b>          | 2021       | Clinical center                        | 1                      | Master degree candidate in medicine                                       | No                              | Online/Virtual interviews                              |
| <b>South Africa</b>   | 2021       | Clinical center                        | 2                      | Registrar in paediatric surgery and rotating Intern                       | No                              | Clinical center/Hospital                               |
| <b>Norway</b>         | 2021-2022  | Clinical center, Patient support group | 3                      | Medical doctors, clinical nutritionist                                    | Yes <sup>1</sup> /No            | Clinical center/Hospital, Telephone (three interviews) |
| <b>France</b>         | 2021-2022  | Clinical center                        | 1                      | Psychologist                                                              | Yes                             | Clinical center/Hospital                               |
| <b>Mexico</b>         | 2022       | Clinical center                        | 2                      | Pediatric Surgeons                                                        | Yes                             | Clinical center/Hospital                               |

<sup>1</sup>The researcher with the main responsibility of the cognitive debriefing interviews and conducted most of them did not have a care and treatment relationship with the children
