# Supplementary material for: An International Collaborative Initiative to Establish a Quality-of-Life Questionnaire for Children and Adolescents with Repair of Esophageal Atresia in 14 Countries
Source: MDPI journal article supplement (doi:10.3390/children11030286), 2024-02-26
Supplement: s1 [file s1]

#### [Supplementary File S3](#)

Supplementary File 3a-b describes the number and percentage of children with esophageal atresia aged 8-18 and their parent-proxies who rated the items of the EA-QOL questionnaire as easy to understand. The results from the cognitive debriefing of the EA-QOL questionnaire for children with esophageal atresia aged 8-18 are presented for Sweden-Germany<sup>33</sup> as a reference from the primary item evaluation and for Europe (Croatia, France, Hungary, Norway, Poland, Spain, Turkey, United Kingdom, Africa (South Africa), Asia (China<sup>45</sup>), Central America (Mexico) and North-America (USA) as the new item evaluation.

| Supplementary file 3a. Number and percentage of children with esophageal atresia aged 8-18 who rated the item of the EA-QOL questionnaires as easy to understand |    |                                                                                                   |                               |                   |                     |                   |                 |                  |                |                  |                              |                          |                    |                         |                       |                                           |
|------------------------------------------------------------------------------------------------------------------------------------------------------------------|----|---------------------------------------------------------------------------------------------------|-------------------------------|-------------------|---------------------|-------------------|-----------------|------------------|----------------|------------------|------------------------------|--------------------------|--------------------|-------------------------|-----------------------|-------------------------------------------|
|                                                                                                                                                                  |    |                                                                                                   | EUROPE                        |                   |                     |                   |                 |                  |                |                  |                              | AFRIC<br>A               | ASIA               | CENTRAL<br>-<br>AMERICA | NORTH-<br>AMERIC<br>A | CROSS-<br>CULTURA<br>L                    |
|                                                                                                                                                                  |    |                                                                                                   | Sweden-<br>German<br>y (n=15) | Croati<br>a (n=9) | Franc<br>e<br>(n=4) | Hungar<br>y (n=6) | Norway(n=8<br>) | Polan<br>d (n=9) | Spain<br>(n=9) | Turke<br>y (n=5) | United<br>Kingdo<br>m (n=10) | South<br>Africa<br>(n=6) | Chin<br>a<br>(n=6) | Mexico<br>(n=4)         | USA(n=6)              | Cross-<br>cultural<br>(n=82) <sup>c</sup> |
| EATING                                                                                                                                                           | 1. | I feel distressed that food gets stuck in my throat when I eat                                    | 14(93.3)                      | 9(100)            | 4(100)              | 6(100)            | 7(87.5)         | 9(100)           | 9(100)         | 5(100)           | 10(100)                      | 6(100)                   | 6(100)             | 4(100)                  | 6(100)                | 81(98.8)                                  |
|                                                                                                                                                                  | 2. | My health condition restricts me from eating certain foods'                                       | 14(93.3)                      | 8(88.9)           | 4(100)              | 6(100)            | 8(100)          | 9(100)           | 9(100)         | 5(100)           | 9(90)                        | 6(100)                   | 6(100)             | 3(75)                   | 6(100)                | 79(96.3)                                  |
|                                                                                                                                                                  | 3. | It hurts when I eat because of my health condition (e.g. when food sticks, heartburn, tummy ache) | 15(100)                       | 9(100)            | 4(100)              | 6(100)            | 8(100)          | 9(100)           | 9(100)         | 4(80)            | 10(100)                      | 6(100)                   | 6(100)             | 4(100)                  | 6(100)                | 81(98.8)                                  |
|                                                                                                                                                                  | 4. | I have to remind myself to drink liquids when I eat                                               | 14(93.3)                      | 9(100)            | 4(100)              | 6(100)            | 8(100)          | 9(100)           | 9(100)         | 5(100)           | 9(90)                        | 6(100)                   | 6(100)             | 4(100)                  | 5(83.3)               | 80(97.6)                                  |
|                                                                                                                                                                  | 5. | I am afraid when I choke while eating                                                             | 15(100)                       | 9(100)            | 4(100)              | 6(100)            | 8(100)          | 9(100)           | 9(100)         | 4(80)            | 9(90)                        | 5(83.3)                  | 6(100)             | 4(100)                  | 6(100)                | 79(96.3)                                  |

|                      |     |                                                                                                |                      |         |        |         |         |        |         |        |         |        |        |        |        |          |
|----------------------|-----|------------------------------------------------------------------------------------------------|----------------------|---------|--------|---------|---------|--------|---------|--------|---------|--------|--------|--------|--------|----------|
|                      | 6.  | I feel that my experiences of choking make it difficult for me to eat                          | 14(93.3)             | 9(100)  | 4(100) | 6(100)  | 7(87.5) | 9(100) | 9(100)  | 4(80)  | 9(90)   | 6(100) | 6(100) | 4(100) | 6(100) | 79(96.3) |
|                      | 7.  | I can eat at the same speed/pace as other children my age                                      | 15(100)              | 9(100)  | 4(100) | 6(100)  | 7(87.5) | 9(100) | 8(88.9) | 5(100) | 10(100) | 6(100) | 6(100) | 4(100) | 6(100) | 80(97.6) |
|                      | 8.  | It bothers me if I vomit after I eat                                                           | 13(86.7)             | 8(88.9) | 4(100) | 6(100)  | 8(100)  | 9(100) | 8(88.9) | 4(80)  | 10(100) | 6(100) | 6(100) | 4(100) | 6(100) | 79(96.3) |
| SOCIAL RELATIONSHIPS | 9.  | I feel like the only one who was born with esophageal atresia                                  | 14(100) <sup>a</sup> | 8(88.9) | 4(100) | 6(100)  | 7(87.5) | 9(100) | 9(100)  | 4(80)  | 10(100) | 6(100) | 6(100) | 4(100) | 6(100) | 79(96.3) |
|                      | 10. | It is complicated to explain to others what esophageal atresia is                              | 13(86.7)             | 8(88.9) | 4(100) | 5(83.3) | 8(100)  | 9(100) | 8(88.9) | 5(100) | 10(100) | 6(100) | 6(100) | 4(100) | 6(100) | 79(96.3) |
|                      | 11. | People call me names (perhaps because of your size, having an unusual cough, eating slowly, or | 15(100)              | 8(88.9) | 4(100) | 6(100)  | 8(100)  | 9(100) | 9(100)  | 4(80)  | 9(90)   | 6(100) | 6(100) | 4(100) | 6(100) | 79(96.3) |

|                 |    |                                                                                                       |          |                     |        |        |         |        |        |        |         |         |        |        |         |                       |
|-----------------|----|-------------------------------------------------------------------------------------------------------|----------|---------------------|--------|--------|---------|--------|--------|--------|---------|---------|--------|--------|---------|-----------------------|
|                 |    | because you have a surgical scar)                                                                     |          |                     |        |        |         |        |        |        |         |         |        |        |         |                       |
|                 | 12 | I feel that other people are staring at me (e.g. when coughing, choking, dressing in the locker room) | 13(86.7) | 8(88.9)             | 4(100) | 6(100) | 8(100)  | 9(100) | 9(100) | 5(100) | 10(100) | 6(100)  | 6(100) | 4(100) | 6(100)  | 81(98.8)              |
|                 | 13 | I get tired of people asking about the scar/scars                                                     | 14(93.3) | 8(88.9)             | 4(100) | 6(100) | 8(100)  | 9(100) | 9(100) | 5(100) | 10(100) | 6(100)  | 6(100) | 4(100) | 6(100)  | 81(98.8)              |
|                 | 14 | Other people say unkind things about me                                                               | 15(100)  | 8(88.9)             | 4(100) | 6(100) | 7(87.5) | 9(100) | 9(100) | 5(100) | 9(90)   | 6(100)  | 6(100) | 4(100) | 6(100)  | 79(96.3)              |
|                 | 15 | It feels awkward when other people ask me about esophageal atresia                                    | 14(93.3) | 8(88.9)             | 4(100) | 6(100) | 7(87.5) | 9(100) | 9(100) | 4(80)  | 10(100) | 5(83.3) | 6(100) | 4(100) | 6(100)  | 78(95.1)              |
| BODY PERCEPTION | 16 | I feel different because I have scars                                                                 | 15(100)  | 8(88.9)             | 4(100) | 6(100) | 8(100)  | 9(100) | 9(100) | 5(100) | 10(100) | 6(100)  | 6(100) | 4(100) | 5(83.3) | 80(97.6)              |
|                 | 17 | I am careful about what I wear because of                                                             | 14(93.3) | 8(100) <sup>a</sup> | 4(100) | 6(100) | 7(87.5) | 9(100) | 9(100) | 5(100) | 10(100) | 5(83.3) | 6(100) | 4(100) | 5(83.3) | 78(96.3) <sup>a</sup> |

|                     |         |                                                                                                                                                                                                             |          |                      |        |        |        |        |        |        |                     |         |        |        |         |                       |
|---------------------|---------|-------------------------------------------------------------------------------------------------------------------------------------------------------------------------------------------------------------|----------|----------------------|--------|--------|--------|--------|--------|--------|---------------------|---------|--------|--------|---------|-----------------------|
|                     |         | my scar<br>/scars                                                                                                                                                                                           |          |                      |        |        |        |        |        |        |                     |         |        |        |         |                       |
|                     | 18<br>. | I feel<br>awkward<br>when my<br>scar/scars<br>are visible<br>to other<br>people (e.g.<br>new<br>people, boy<br>or<br>girlfriend,<br>people in<br>the<br>changing<br>room, or in<br>the<br>swimming<br>pool) | 13(86.7) | 8(100) <sup>a</sup>  | 4(100) | 6(100) | 8(100) | 9(100) | 9(100) | 5(100) | 10(100)             | 6(100)  | 6(100) | 4(100) | 5(83.3) | 80(98.8)              |
|                     | 19<br>. | I am<br>unhappy<br>with the<br>way I look<br>because I<br>have scars                                                                                                                                        | 15(100)  | 8(100) <sup>a</sup>  | 4(100) | 6(100) | 8(100) | 9(100) | 9(100) | 5(100) | 9(100) <sup>a</sup> | 5(83.3) | 6(100) | 4(100) | 5(83.3) | 78(97.5) <sup>b</sup> |
|                     | 20<br>. | It bothers<br>me that I<br>am smaller<br>than<br>children<br>my age                                                                                                                                         | 13(86.7) | 7(87.5) <sup>a</sup> | 4(100) | 6(100) | 8(100) | 9(100) | 9(100) | 5(100) | 10(100)             | 6(100)  | 6(100) | 4(100) | 5(83.3) | 80(98.8) <sup>a</sup> |
| HEALTH & WELL-BEING | 21<br>. | I am<br>bothered by<br>breathing<br>difficulties<br>if I exercise<br>and play                                                                                                                               | 15(100)  | 8(100) <sup>a</sup>  | 4(100) | 6(100) | 8(100) | 9(100) | 9(100) | 5(100) | 9(90)               | 6(100)  | 6(100) | 4(100) | 6(100)  | 80(98.8) <sup>a</sup> |
|                     | 22<br>. | I have<br>trouble<br>falling or                                                                                                                                                                             | 14(93.3) | 8(100) <sup>a</sup>  | 4(100) | 6(100) | 8(100) | 9(100) | 9(100) | 5(100) | 10(100)             | 5(83.3) | 6(100) | 4(100) | 6(100)  | 80(98.8) <sup>a</sup> |

|                                                                                                                      |    |                                                                                                                |          |                     |        |        |         |        |        |        |         |        |        |        |        |                       |
|----------------------------------------------------------------------------------------------------------------------|----|----------------------------------------------------------------------------------------------------------------|----------|---------------------|--------|--------|---------|--------|--------|--------|---------|--------|--------|--------|--------|-----------------------|
|                                                                                                                      |    | staying asleep at night because of my health condition. (e.g. acid reflux, heartburn, or respiratory problems) |          |                     |        |        |         |        |        |        |         |        |        |        |        |                       |
|                                                                                                                      | 23 | I am worried about my future because of esophageal atresia (e.g. school, friends, boy or girlfriend, work)     | 13(86.7) | 8(100) <sup>a</sup> | 4(100) | 6(100) | 7(87.5) | 9(100) | 9(100) | 5(100) | 10(100) | 6(100) | 6(100) | 4(100) | 6(100) | 80(98.8) <sup>a</sup> |
|                                                                                                                      | 24 | Esophageal atresia makes me sad                                                                                | 13(86.7) | 8(100) <sup>a</sup> | 4(100) | 6(100) | 8(100)  | 9(100) | 9(100) | 5(100) | 10(100) | 6(100) | 6(100) | 4(100) | 6(100) | 81(100) <sup>a</sup>  |
| <sup>a</sup> 1 missing value<br><sup>b</sup> 2 missing values<br><sup>c</sup> excluding data from Sweden and Germany |    |                                                                                                                |          |                     |        |        |         |        |        |        |         |        |        |        |        |                       |

| Additional file 3b. Number and percentage of parents of children with esophageal atresia aged 8-18 who rated the item of the EA-QOL questionnaires as easy to understand |    |                                                                                                      |                       |               |              |               |              |              |             |              |                       |                    |             |                 |               |                                    |
|--------------------------------------------------------------------------------------------------------------------------------------------------------------------------|----|------------------------------------------------------------------------------------------------------|-----------------------|---------------|--------------|---------------|--------------|--------------|-------------|--------------|-----------------------|--------------------|-------------|-----------------|---------------|------------------------------------|
|                                                                                                                                                                          |    |                                                                                                      | EUROPE                |               |              |               |              |              |             |              |                       | AFRICA             | ASIA        | CENTRAL-AMERICA | NORTH-AMERICA | CROSS-CULTURAL                     |
|                                                                                                                                                                          |    |                                                                                                      | Sweden-Germany (n=13) | Croatia (n=9) | France (n=5) | Hungary (n=6) | Norway (n=8) | Poland (n=9) | Spain (n=9) | Turkey (n=7) | United Kingdom (n=10) | South Africa (n=6) | China (n=6) | Mexico (n=5)    | USA(n=6)      | Cross-cultural (n=86) <sup>c</sup> |
| EATING                                                                                                                                                                   | 1. | My child feels distressed that food gets stuck in their throat when they eat                         | 13(100)               | 8(88.9)       | 5(100)       | 6(100)        | 6(75.0)      | 9(100)       | 9(100)      | 7(100)       | 8(80)                 | 6(100)             | 6(100)      | 5(100)          | 6(100)        | 81(94.2)                           |
|                                                                                                                                                                          | 2. | My child's health condition restricts them from eating certain foods                                 | 12(92.3)              | 9(100)        | 5(100)       | 6(100)        | 7(87.5)      | 9(100)       | 9(100)      | 7(100)       | 8(80)                 | 6(100)             | 6(100)      | 5(100)          | 6(100)        | 83(96.5)                           |
|                                                                                                                                                                          | 3. | My child's health condition causes pain when they eat (e.g. when food sticks, heartburn, tummy ache) | 12(92.3)              | 9(100)        | 5(100)       | 6(100)        | 8(100)       | 9(100)       | 9(100)      | 7(100)       | 8(80)                 | 6(100)             | 6(100)      | 5(100)          | 6(100)        | 84(97.4)                           |
|                                                                                                                                                                          | 4. | My child needs to remind themselves to drink liquids when they eat                                   | 11(91.7)              | 9(100)        | 5(100)       | 6(100)        | 7(87.5)      | 9(100)       | 8(88.9)     | 7(100)       | 6(60)                 | 6(100)             | 6(100)      | 5(100)          | 6(100)        | 80(93.0)                           |
|                                                                                                                                                                          | 5. | My child is afraid when they choke while eating                                                      | 13(100)               | 9(100)        | 5(100)       | 6(100)        | 6(75.0)      | 9(100)       | 9(100)      | 7(100)       | 7(70)                 | 6(100)             | 6(100)      | 5(100)          | 6(100)        | 81(94.2)                           |
|                                                                                                                                                                          | 6. | My child's choking experiences make it difficult for them to eat                                     | 13(100)               | 9(100)        | 5(100)       | 6(100)        | 7(87.5)      | 9(100)       | 9(100)      | 7(100)       | 6(60)                 | 6(100)             | 6(100)      | 5(100)          | 6(100)        | 81(94.2)                           |

|                      |     |                                                                                                                  |          |         |        |         |                      |        |         |         |         |         |        |        |        |                       |
|----------------------|-----|------------------------------------------------------------------------------------------------------------------|----------|---------|--------|---------|----------------------|--------|---------|---------|---------|---------|--------|--------|--------|-----------------------|
|                      | 7.  | My child can eat at the same speed/pace as other children their age                                              | 13(100)  | 9(100)  | 5(100) | 6(100)  | 8(100)               | 9(100) | 9(100)  | 7(100)  | 7(70)   | 6(100)  | 6(100) | 5(100) | 6(100) | 83(96.5)              |
|                      | 8.  | It bothers my child if they vomit after eating                                                                   | 13(100)  | 8(88.9) | 5(100) | 6(100)  | 7(87.5)              | 9(100) | 7(77.8) | 6(85.7) | 3(30)   | 6(100)  | 6(100) | 5(100) | 6(100) | 74(86.0)              |
| SOCIAL RELATIONSHIPS | 9.  | My child feels like to only one to be born with esophageal atresia                                               | 13(100)  | 9(100)  | 5(100) | 5(83.3) | 8(100)               | 9(100) | 9(100)  | 7(100)  | 10(100) | 6(100)  | 6(100) | 5(100) | 6(100) | 85(98.8)              |
|                      | 10. | My child finds it complicated to explain to others what esophageal atresia is                                    | 13(100)  | 9(100)  | 5(100) | 6(100)  | 6(85.7) <sup>a</sup> | 9(100) | 8(88.9) | 7(100)  | 10(100) | 5(83.3) | 6(100) | 5(100) | 6(100) | 82(96.5) <sup>a</sup> |
|                      | 11. | My child is called names (e.g. because of their size, unusual cough, slow eating or because of their scar/scars) | 13(100)  | 9(100)  | 5(100) | 6(100)  | 7(87.5)              | 9(100) | 9(100)  | 7(100)  | 10(100) | 6(100)  | 6(100) | 5(100) | 6(100) | 85(98.8)              |
|                      | 12. | My child feel that other stare at them (e.g. when coughing, choking, dressing in the locker room)                | 13(100)  | 9(100)  | 5(100) | 6(100)  | 8(100)               | 9(100) | 9(100)  | 7(100)  | 10(100) | 6(100)  | 6(100) | 5(100) | 6(100) | 86(100)               |
|                      | 13. | My child gets tired of people asking about their scar/scars                                                      | 12(92.3) | 9(100)  | 5(100) | 6(100)  | 8(100)               | 9(100) | 9(100)  | 7(100)  | 10(100) | 6(100)  | 6(100) | 5(100) | 6(100) | 86(100)               |



|                 |     |                                                                            |                      |         |        |        |         |        |        |        |                      |        |        |        |        |                       |
|-----------------|-----|----------------------------------------------------------------------------|----------------------|---------|--------|--------|---------|--------|--------|--------|----------------------|--------|--------|--------|--------|-----------------------|
|                 | 14. | Other people say unkind things about my child                              | 12(92.3)             | 9(100)  | 5(100) | 6(100) | 6(75.0) | 9(100) | 9(100) | 7(100) | 7(70)                | 6(100) | 6(100) | 5(100) | 6(100) | 81(94.2)              |
|                 | 15. | My child feels awkward when other people ask them about esophageal atresia | 13(100)              | 9(100)  | 5(100) | 6(100) | 6(75.0) | 9(100) | 9(100) | 7(100) | 10(100)              | 6(100) | 6(100) | 5(100) | 6(100) | 84(97.7)              |
| BODY PERCEPTION | 16. | My child feels different because they have a scar/scars                    | 13(100)              | 8(88.9) | 5(100) | 6(100) | 8(100)  | 9(100) | 9(100) | 7(100) | 10(100)              | 6(100) | 6(100) | 5(100) | 6(100) | 85(98.8)              |
|                 | 17. | My child is careful about what they wear because of their scar/scars       | 13(100)              | 8(88.9) | 5(100) | 6(100) | 8(100)  | 9(100) | 9(100) | 7(100) | 10(100)              | 6(100) | 6(100) | 5(100) | 6(100) | 85(98.8)              |
|                 | 18. | My child feels awkward when their scar/scars are visible to other people   | 13(100)              | 8(88.9) | 5(100) | 6(100) | 8(100)  | 9(100) | 9(100) | 7(100) | 8(80)                | 6(100) | 6(100) | 5(100) | 6(100) | 83(96.5)              |
|                 | 19. | My child is unhappy with the way they look because of their scar/scars     | 13(100)              | 8(88.9) | 5(100) | 6(100) | 7(87.5) | 9(100) | 9(100) | 7(100) | 7(77.8) <sup>a</sup> | 6(100) | 6(100) | 5(100) | 6(100) | 81(95.3) <sup>a</sup> |
|                 | 20. | My child is bothered that they are smaller than children their age         | 11(100) <sup>b</sup> | 8(88.9) | 5(100) | 6(100) | 8(100)  | 9(100) | 9(100) | 7(100) | 10(100)              | 6(100) | 6(100) | 5(100) | 6(100) | 85(98.8)              |
| HEALTH PROBLEMS | 21. | My child is bothered by breathing difficulties if                          | 13(100)              | 8(88.9) | 5(100) | 6(100) | 8(100)  | 9(100) | 9(100) | 7(100) | 9(90)                | 6(100) | 6(100) | 5(100) | 6(100) | 84(97.7)              |

|                                                                                                         |     |                                                                                                                                                 |                      |         |        |        |         |        |        |        |         |        |        |        |        |          |
|---------------------------------------------------------------------------------------------------------|-----|-------------------------------------------------------------------------------------------------------------------------------------------------|----------------------|---------|--------|--------|---------|--------|--------|--------|---------|--------|--------|--------|--------|----------|
|                                                                                                         |     | they exercise and play                                                                                                                          |                      |         |        |        |         |        |        |        |         |        |        |        |        |          |
|                                                                                                         | 22. | My child has trouble falling or staying asleep at night because of their health condition(e.g. acid reflux, heartburn, or respiratory problems) | 13(100)              | 7(77.8) | 5(100) | 6(100) | 8(100)  | 9(100) | 9(100) | 7(100) | 8(80)   | 6(100) | 6(100) | 5(100) | 6(100) | 82(95.3) |
|                                                                                                         | 23. | My child worries about their future because of esophageal atresia (e.g. school, friends, boy or girlfriend, work)                               | 12(100) <sup>a</sup> | 7(77.8) | 5(100) | 6(100) | 6(75.0) | 9(100) | 9(100) | 7(100) | 10(100) | 6(100) | 6(100) | 5(100) | 6(100) | 82(95.3) |
|                                                                                                         | 24. | My child feels sad because of esophageal atresia                                                                                                | 12(100) <sup>a</sup> | 7(77.8) | 5(100) | 6(100) | 7(87.5) | 9(100) | 9(100) | 7(100) | 9(90)   | 6(100) | 6(100) | 5(100) | 6(100) | 82(95.3) |
| <sup>a</sup> 1 missing<br><sup>b</sup> 2 missing<br><sup>c</sup> excluding data from Sweden and Germany |     |                                                                                                                                                 |                      |         |        |        |         |        |        |        |         |        |        |        |        |          |

[Supplementary file 3c-d.](#)

Supplementary file 3c-d describes the number and percentage of children with esophageal atresia aged 8-18 and their parent-proxies who rated the items of the EA-QOL questionnaire as sensitive to answer. The results from the cognitive debriefing of the EA-QOL questionnaire for children with esophageal atresia aged 8-18 are presented for Sweden-Germany<sup>1</sup> as a reference from the primary item evaluation and for Europe (Croatia, France, Hungary, Norway, Poland, Spain, Turkey, United Kingdom, Africa (South Africa), Asia (China<sup>2</sup>), Central America (Mexico) and North-America (USA) as the new item evaluation.

Supplementary file 3c. Number and percentage of children with esophageal atresia aged 8-18 who rated the item of the EA-QOL questionnaire as sensitive to answer

|        |    |                                                                                                   | EUROPE                |               |              |               |             |              |              |              |                       | AFRICA             | ASIA        | CENTRAL-AMERICA | NORTH-AMERICA | CROSS-CULTURAL                    |
|--------|----|---------------------------------------------------------------------------------------------------|-----------------------|---------------|--------------|---------------|-------------|--------------|--------------|--------------|-----------------------|--------------------|-------------|-----------------|---------------|-----------------------------------|
|        |    |                                                                                                   | Sweden-Germany (n=15) | Croatia (n=9) | France (n=4) | Hungary (n=6) | Norway(n=8) | Poland (n=9) | Spain (n=10) | Turkey (n=5) | United Kingdom (n=10) | South Africa (n=6) | China (n=6) | Mexico (n=4)    | USA(n=6)      | Cross-cultural(n=82) <sup>c</sup> |
| EATING | 1. | I feel distressed that food gets stuck in my throat when I eat                                    | 0                     | 0             | 0            | 0             | 1(12.5)     | 0            | 0            | 1(20.0)      | 0                     | 1(16.7)            | 0           | 0               | 0             | 3(3.7)                            |
|        | 2. | My health condition restricts me from eating certain foods'                                       | 1(6.7)                | 0             | 0            | 0             | 0           | 0            | 0            | 0            | 0                     | 1(16.7)            | 0           | 0               | 0             | 1(1.2)                            |
|        | 3. | It hurts when I eat because of my health condition (e.g. when food sticks, heartburn, tummy ache) | 0                     | 0             | 0            | 0             | 0           | 0            | 0            | 0            | 0                     | 0                  | 0           | 0               | 1(16.7)       | 1(1.2)                            |
|        | 4. | I have to remind myself to drink liquids when I eat                                               | 0                     | 0             | 0            | 0             | 0           | 0            | 0            | 1(20.0)      | 0                     | 1(16.7)            | 0           | 0               | 0             | 2(2.4)                            |
|        | 5. | I am afraid when I choke while eating                                                             | 0                     | 0             | 0            | 0             | 0           | 0            | 0            | 1(20.0)      | 0                     | 1(16.7)            | 0           | 0               | 0             | 2(2.4)                            |
|        | 6. | I feel that my experiences of choking make it difficult for me to eat                             | 2(13.3)               | 0             | 0            | 0             | 0           | 0            | 0            | 0            | 0                     | 0                  | 0           | 0               | 1(16.7)       | 1(1.2)                            |
|        | 7. | I can eat at the same speed/pace as other children my age                                         | 0                     | 0             | 0            | 0             | 0           | 0            | 0            | 0            | 0                     | 1(16.7)            | 0           | 0               | 0             | 1(1.2)                            |

|                      |     |                                                                                                                                  |                     |   |   |   |   |   |   |         |                |         |   |   |         |                     |
|----------------------|-----|----------------------------------------------------------------------------------------------------------------------------------|---------------------|---|---|---|---|---|---|---------|----------------|---------|---|---|---------|---------------------|
|                      | 8.  | It bothers me if I vomit after I eat                                                                                             | 0                   | 0 | 0 | 0 | 0 | 0 | 0 | 1(20.0) | 0              | 0       | 0 | 0 | 0       | 1(1.2)              |
| SOCIAL RELATIONSHIPS | 9.  | I feel like the only one who was born with esophageal atresia                                                                    | 1(7.1) <sup>a</sup> | 0 | 0 | 0 | 0 | 0 | 0 | 0       | 2(20)          | 2(33.3) | 0 | 0 | 1(16.7) | 5(6.1)              |
|                      | 10. | It is complicated to explain to others what esophageal atresia is                                                                | 1(6.7)              | 0 | 0 | 0 | 0 | 0 | 0 | 0       | 0              | 1(16.7) | 0 | 0 | 0       | 1(1.2)              |
|                      | 11. | People call me names (perhaps because of your size, having an unusual cough, eating slowly, or because you have a surgical scar) | 1(6.7)              | 0 | 0 | 0 | 0 | 0 | 0 | 2(40.0) | 0              | 2(33.3) | 0 | 0 | 1(16.7) | 5(6.1)              |
|                      | 12. | I feel that other people are staring at me (e.g. when coughing, choking, dressing in the locker room)                            | 0                   | 0 | 0 | 0 | 0 | 0 | 0 | 1(20.0) | 2(20)          | 2(33.3) | 0 | 0 | 1(16.7) | 6(7.3)              |
|                      | 13. | I get tired of people asking about the scar/scars                                                                                | 1(6.7)              | 0 | 0 | 0 | 0 | 0 | 0 | 0       | 0              | 2(33.3) | 0 | 0 | 1(16.7) | 3(3.7)              |
|                      | 14. | Other people say unkind things about me                                                                                          | 0                   | 0 | 0 | 0 | 0 | 0 | 0 | 0       | 0 <sup>a</sup> | 1(16.7) | 0 | 0 | 1(16.7) | 2(2.5) <sup>a</sup> |
|                      | 15. | It feels awkward when other people ask me about                                                                                  | 1(6.7)              | 0 | 0 | 0 | 0 | 0 | 0 | 1(20.0) | 0              | 0       | 0 | 0 | 1(16.7) | 2(2.4)              |

|                     |     |                                                                                                                                                          |         |                |   |   |         |   |   |         |                      |         |   |         |                     |                     |
|---------------------|-----|----------------------------------------------------------------------------------------------------------------------------------------------------------|---------|----------------|---|---|---------|---|---|---------|----------------------|---------|---|---------|---------------------|---------------------|
|                     |     | esophageal atresia                                                                                                                                       |         |                |   |   |         |   |   |         |                      |         |   |         |                     |                     |
| BODY PERCEPTION     | 16. | I feel different because I have scars                                                                                                                    | 1(6.7)  | 0              | 0 | 0 | 0       | 0 | 0 | 0       | 2(33.3)              | 0       | 0 | 2(33.3) | 4(4.9)              |                     |
|                     | 17. | I am careful about what I wear because of my scar /scars                                                                                                 | 0       | 0 <sup>a</sup> | 0 | 0 | 0       | 0 | 0 | 1(20.0) | 0                    | 2(33.3) | 0 | 0       | 2(33.3)             | 5(6.2) <sup>a</sup> |
|                     | 18. | I feel awkward when my scar/scars are visible to other people (e.g. new people, boy or girlfriend, people in the changing room, or in the swimming pool) | 1(6.7)  | 0 <sup>a</sup> | 0 | 0 | 0       | 0 | 0 | 1(20.0) | 0                    | 1(16.7) | 0 | 0       | 2(33.3)             | 4(4.9) <sup>a</sup> |
|                     | 19. | I am unhappy with the way I look because I have scars                                                                                                    | 2(13.3) | 0 <sup>a</sup> | 0 | 0 | 1(12.5) | 0 | 0 | 1(20.0) | 2(22.2) <sup>a</sup> | 1(16.7) | 0 | 0       | 2(33.3)             | 7(8.8) <sup>b</sup> |
|                     | 20. | It bothers me that I am smaller than children my age                                                                                                     | 1(6.7)  | 0 <sup>a</sup> | 0 | 0 | 0       | 0 | 0 | 1(20.0) | 0                    | 1(16.7) | 0 | 0       | 2(33.3)             | 4(4.9) <sup>a</sup> |
| HEALTH & WELL-BEING | 21. | I am bothered by breathing difficulties if I exercise and play                                                                                           | 1(6.7)  | 0 <sup>a</sup> | 0 | 0 | 0       | 0 | 0 | 0       | 1(16.7)              | 0       | 0 | 2(33.3) | 3(3.7) <sup>a</sup> |                     |
|                     | 22. | I have trouble falling or staying asleep at night because of my health condition. (e.g. acid reflux, heartburn, or                                       | 0       | 0 <sup>a</sup> | 0 | 0 | 0       | 0 | 0 | 0       | 0                    | 0       | 0 | 1(16.7) | 1(1.2) <sup>a</sup> |                     |

|                                                                                                                      |                                                                                                            |                       |                |         |   |   |   |   |   |         |                    |   |   |         |                     |
|----------------------------------------------------------------------------------------------------------------------|------------------------------------------------------------------------------------------------------------|-----------------------|----------------|---------|---|---|---|---|---|---------|--------------------|---|---|---------|---------------------|
|                                                                                                                      |                                                                                                            | respiratory problems) |                |         |   |   |   |   |   |         |                    |   |   |         |                     |
| 23.                                                                                                                  | I am worried about my future because of esophageal atresia (e.g. school, friends, boy or girlfriend, work) | 0                     | 0 <sup>a</sup> | 0       | 0 | 0 | 0 | 0 | 0 | 0       | 1(20) <sup>a</sup> | 0 | 0 | 2(33.3) | 3(3.8) <sup>b</sup> |
| 24.                                                                                                                  | Esophageal atresia makes me sad                                                                            | 1(6.7)                | 0 <sup>a</sup> | 1(25.0) | 0 | 0 | 0 | 0 | 0 | 4(40.0) | 2(33.3)            | 0 | 0 | 1(16.7) | 8(9.9) <sup>a</sup> |
| <sup>a</sup> 1 missing value<br><sup>b</sup> 2 missing values<br><sup>c</sup> excluding data from Sweden and Germany |                                                                                                            |                       |                |         |   |   |   |   |   |         |                    |   |   |         |                     |

| Supplementary file 3d. Number and percentage of parents of children with esophageal atresia aged 8-18 who rated the item of the EA-QOL questionnaire as sensitive to answer |    |                                                                                                      |                       |               |              |               |              |              |             |              |                       |                    |             |                 |               |                                    |
|-----------------------------------------------------------------------------------------------------------------------------------------------------------------------------|----|------------------------------------------------------------------------------------------------------|-----------------------|---------------|--------------|---------------|--------------|--------------|-------------|--------------|-----------------------|--------------------|-------------|-----------------|---------------|------------------------------------|
|                                                                                                                                                                             |    |                                                                                                      | EUROPE                |               |              |               |              |              |             |              |                       | AFRICA             | ASIA        | CENTRAL-AMERICA | NORTH-AMERICA | CROSS-CULTURAL                     |
|                                                                                                                                                                             |    |                                                                                                      | Sweden-Germany (n=13) | Croatia (n=9) | France (n=5) | Hungary (n=6) | Norway (n=8) | Poland (n=9) | Spain (n=9) | Turkey (n=7) | United Kingdom (n=10) | South Africa (n=6) | China (n=6) | Mexico (n=5)    | USA (n=6)     | Cross-cultural (n=86) <sup>c</sup> |
| EATING                                                                                                                                                                      | 1. | My child feels distressed that food gets stuck in their throat when they eat                         | 0 <sup>a</sup>        | 0             | 0            | 0             | 0            | 0            | 0           | 0            | 0                     | 0                  | 0           | 0               | 0             | 0                                  |
|                                                                                                                                                                             | 2. | My child's health condition restricts them from eating certain foods                                 | 0 <sup>a</sup>        | 0             | 0            | 0             | 1(12.5)      | 0            | 0           | 0            | 0                     | 0                  | 0           | 0               | 0             | 1(1.2)                             |
|                                                                                                                                                                             | 3. | My child's health condition causes pain when they eat (e.g. when food sticks, heartburn, tummy ache) | 0 <sup>a</sup>        | 0             | 0            | 0             | 0            | 0            | 0           | 0            | 0                     | 1(16.7)            | 0           | 0               | 0             | 1(1.2)                             |
|                                                                                                                                                                             | 4. | My child needs to remind themselves to drink liquids when they eat                                   | 0 <sup>b</sup>        | 0             | 0            | 0             | 1(12.5)      | 0            | 0           | 0            | 0                     | 1(16.7)            | 0           | 0               | 0             | 2(2.3)                             |
|                                                                                                                                                                             | 5. | My child is afraid when they choke while eating                                                      | 0 <sup>a</sup>        | 0             | 0            | 0             | 0            | 0            | 0           | 0            | 1(10.0)               | 1(16.7)            | 0           | 0               | 0             | 2(2.3)                             |
|                                                                                                                                                                             | 6. | My child's choking experiences make it difficult for them to eat                                     | 0 <sup>a</sup>        | 0             | 0            | 0             | 0            | 0            | 0           | 0            | 0                     | 1(16.7)            | 0           | 0               | 0             | 1(1.2)                             |
|                                                                                                                                                                             | 7. | My child can eat at the same speed/pace as                                                           | 1(8.3) <sup>a</sup>   | 0             | 0            | 0             | 0            | 0            | 0           | 0            | 1(10.0)               | 1(16.7)            | 0           | 0               | 0             | 2(2.3)                             |



|                      |     |                                                                                                                                       |                     |   |   |         |                      |   |   |         |         |         |   |   |                |                     |
|----------------------|-----|---------------------------------------------------------------------------------------------------------------------------------------|---------------------|---|---|---------|----------------------|---|---|---------|---------|---------|---|---|----------------|---------------------|
|                      |     | other children<br>their age                                                                                                           |                     |   |   |         |                      |   |   |         |         |         |   |   |                |                     |
|                      | 8.  | It bothers my<br>child if they<br>vomit after eating                                                                                  | 0 <sup>s</sup>      | 0 | 0 | 0       | 1(12.5)              | 0 | 0 | 1(14.3) | 0       | 1(16.7) | 0 | 0 | 0              | 3(3.5)              |
| SOCIAL RELATIONSHIPS | 9.  | My child feels<br>like to only one to<br>be born with<br>esophageal<br>atresia                                                        | 1(8.3) <sup>a</sup> | 0 | 0 | 1(16.7) | 1(12.5)              | 0 | 0 | 0       | 2(20.0) | 2(33.3) | 0 | 0 | 0              | 6(7.0)              |
|                      | 10. | My child finds it<br>complicated to<br>explain to others<br>what esophageal<br>atresia is                                             | 0 <sup>a</sup>      | 0 | 0 | 0       | 0                    | 0 | 0 | 0       | 0       | 1(16.7) | 0 | 0 | 0              | 1(1.2)              |
|                      | 11. | My child is called<br>names (e.g.<br>because of their<br>size, unusual<br>cough, slow<br>eating or because<br>of their<br>scar/scars) | 1(8.3) <sup>a</sup> | 0 | 0 | 0       | 1(12.5)              | 0 | 0 | 0       | 5(50.0) | 2(33.3) | 0 | 0 | 0              | 8(9.3)              |
|                      | 12. | My child feel that<br>other stare at<br>them (e.g. when<br>coughing,<br>choking, dressing<br>in the locker<br>room)                   | 0 <sup>a</sup>      | 0 | 0 | 0       | 0                    | 0 | 0 | 0       | 2(20.0) | 0       | 0 | 0 | 0              | 2(2.3)              |
|                      | 13. | My child gets<br>tired of people<br>asking about<br>their scar/scars                                                                  | 0 <sup>a</sup>      | 0 | 0 | 0       | 0                    | 0 | 0 | 0       | 0       | 1(16.7) | 0 | 0 | 0 <sup>a</sup> | 1(1.2) <sup>a</sup> |
|                      | 14. | Other people say<br>unkind things<br>about my child                                                                                   | 1(8.3) <sup>a</sup> | 0 | 0 | 0       | 3(37.5)              | 0 | 0 | 0       | 5(50.0) | 0       | 0 | 0 | 0              | 8(9.3)              |
|                      | 15. | My child feels<br>awkward when<br>other people ask<br>them about                                                                      | 0 <sup>b</sup>      | 0 | 0 | 0       | 1(14.3) <sup>a</sup> | 0 | 0 | 0       | 0       | 1(16.7) | 0 | 0 | 1(16.7)        | 3(3.5) <sup>a</sup> |

|                     |      |                                                                                                                           |                      |   |   |   |         |   |   |   |         |         |   |   |   |          |
|---------------------|------|---------------------------------------------------------------------------------------------------------------------------|----------------------|---|---|---|---------|---|---|---|---------|---------|---|---|---|----------|
|                     |      | esophageal atresia                                                                                                        |                      |   |   |   |         |   |   |   |         |         |   |   |   |          |
| BODY PERCEPTION     | 16.  | My child feels different because they have a scar/scars                                                                   | 0                    | 0 | 0 | 0 | 1(12.5) | 0 | 0 | 0 | 2(20.0) | 1(16.7) | 0 | 0 | 0 | 4(4.7)   |
|                     | 17.  | My child is careful about what they wear because of their scar/scars                                                      | 0                    | 0 | 0 | 0 | 1(12.5) | 0 | 0 | 0 | 0       | 1(16.7) | 0 | 0 | 0 | 2(2.3)   |
|                     | 18.  | My child feels awkward when their scar/scars are visible to other people                                                  | 0                    | 0 | 0 | 0 | 3(37.5) | 0 | 0 | 0 | 3(30.0) | 0       | 0 | 0 | 0 | 6(7.0)   |
|                     | 19.  | My child is unhappy with the way they look because of their scar/scars                                                    | 0                    | 0 | 0 | 0 | 2(25.0) | 0 | 0 | 0 | 6(60.0) | 2(33.3) | 0 | 0 | 0 | 10(11.6) |
|                     | 20.  | My child is bothered that they are smaller than children their age                                                        | 2(16.7) <sup>a</sup> | 0 | 0 | 0 | 2(25.0) | 0 | 0 | 0 | 0       | 0       | 0 | 0 | 0 | 2(2.3)   |
| HEALTH & WELL-BEING | 21.  | My child is bothered by breathing difficulties if they exercise and play                                                  | 1(8.3) <sup>a</sup>  | 0 | 0 | 0 | 0       | 0 | 0 | 0 | 0       | 2(33.3) | 0 | 0 | 0 | 2(2.3)   |
|                     | 22.. | My child has trouble falling or staying asleep at night because of their health condition(e.g. acid reflux, heartburn, or | 0                    | 0 | 0 | 0 | 0       | 0 | 0 | 0 | 1(10)   | 1(16.7) | 0 | 0 | 0 | 2(2.3)   |

|                                                     |     |                                                                                                                   |                     |   |   |   |         |   |   |   |         |         |   |   |   |         |
|-----------------------------------------------------|-----|-------------------------------------------------------------------------------------------------------------------|---------------------|---|---|---|---------|---|---|---|---------|---------|---|---|---|---------|
|                                                     |     | respiratory problems)                                                                                             |                     |   |   |   |         |   |   |   |         |         |   |   |   |         |
|                                                     | 23. | My child worries about their future because of esophageal atresia (e.g. school, friends, boy or girlfriend, work) | 0 <sup>a</sup>      | 0 | 0 | 0 | 1(12.5) | 0 | 0 | 0 | 2(20.0) | 1(16.7) | 0 | 0 | 0 | 4(4.67) |
|                                                     | 24. | My child feels sad because of esophageal atresia                                                                  | 1(8.3) <sup>a</sup> | 0 | 0 | 0 | 0       | 0 | 0 | 0 | 2(20.0) | 1(16.7) | 0 | 0 | 0 | 3(3.5)  |
| <sup>a</sup> 1 missing value                        |     |                                                                                                                   |                     |   |   |   |         |   |   |   |         |         |   |   |   |         |
| <sup>b</sup> 2 missing values                       |     |                                                                                                                   |                     |   |   |   |         |   |   |   |         |         |   |   |   |         |
| <sup>c</sup> excluding data from Sweden and Germany |     |                                                                                                                   |                     |   |   |   |         |   |   |   |         |         |   |   |   |         |

## References as cited in the main manuscript

<sup>33</sup> Dellenmark-Blom M, Abrahamsson K, Quitmann JH, Sommer R, Witt S, Dingemann J, et al. Development and pilot-testing of a condition-specific instrument to assess the quality-of-life in children and adolescents born with esophageal atresia. *Diseases of the Esophagus* 2017;30(7):1-9

<sup>45</sup> Li S, Dellenmark-Blom M, Zhao Y, Gu Y, Li S, Yang S, Quitmann JH, Huang J. The Chinese Mandarin Version of the Esophageal-Atresia-Quality-of-Life Questionnaires for Children and Adolescents: Evaluation of Linguistic and Content Validity. *Int J Environ Res Public Health*. 13;19(22):14923. doi: 10.3390/ijerph192214923.
